# Supplementary material for: Dual-Responsive Hydrogels for Mercury Ion Detection and Removal from Wastewater
Source: MDPI journal article supplement (doi:10.3390/gels10020113), 2024-02-01
Supplement: s1 [file s1]

# Dual-Responsive Hydrogels for Mercury Ion Detection and Removal from Wastewater

Aurel Diacon <sup>1,2</sup>, Florin Albota <sup>3</sup>, Alexandra Mocanu <sup>2,4</sup>, Oana Brincoveanu <sup>4,5</sup>, Alice Ionela Podaru <sup>1</sup>, Traian Rotariu <sup>1</sup>, Ahmad A. Ahmad <sup>6</sup>, Edina Rusen <sup>2,\*</sup> and Gabriela Toader <sup>1,\*</sup>

<sup>1</sup> Military Technical Academy “Ferdinand I”, 39–49 G. Cosbuc Blvd., 050141 Bucharest, Romania; aurel\_diacon@yahoo.com (A.D.); podaru.alice04@gmail.com (A.I.P.); traian.rotariu@mta.ro (T.R.)

<sup>2</sup> Faculty of Chemical Engineering and Biotechnologies, National University of Science and Technology Politehnica Bucharest, 1–7 Gh. Polizu Street, 011061 Bucharest, Romania; alexandra.mocanu@imt.ro

<sup>3</sup> Horia Hulubei National Institute of Physics and Nuclear Engineering, 30 Reactorului Street, 077125 Magurele, Romania; florin.albota@nipne.ro

<sup>4</sup> National Institute for Research and Development in Microtechnologies—IMT Bucharest, 126A Erou Iancu Nicolae Street, 077190 Bucharest, Romania; oana.brincoveanu@imt.ro

<sup>5</sup> Research Institute of the University of Bucharest, University of Bucharest, 90 Sos. Panduri, 050663 Bucharest, Romania

<sup>6</sup> Department of Physical Sciences, Jordan University of Science & Technology, P.O. Box 3030, Irbid 22110, Jordan; sema@just.edu.jo

\* Correspondence: nitagabriela.t@gmail.com (G.T.); edina\_rusen@yahoo.com (E.R.)

## Contents

|                                                                                                                            |   |
|----------------------------------------------------------------------------------------------------------------------------|---|
| Figure S1 – SEM images of the lyophilized hydrogels .....                                                                  | 2 |
| Figure S2 – FTIR plots .....                                                                                               | 5 |
| Figure S3 – UV-Vis calibration curve .....                                                                                 | 5 |
| Scheme S1. RTTA Hg <sup>2+</sup> interaction steps and mechanism for absorption and emission properties modification ..... | 6 |
| Scheme S2. Method principle .....                                                                                          | 6 |
| Figure S4 - Images of RTTA solution color modification due to interaction with different cations .....                     | 7 |
| Figure S5 - Images of RTTA solution emission modification due to interaction with cations .....                            | 7 |
| Figure S6 – ICP-MS calibration .....                                                                                       | 8 |
| Table S1. ICP-MS Accuracy .....                                                                                            | 8 |
| Table S2. Spike Concentrations .....                                                                                       | 8 |

Sample  
EDTA

*Figure S1 – SEM images of the lyophilized hydrogels*

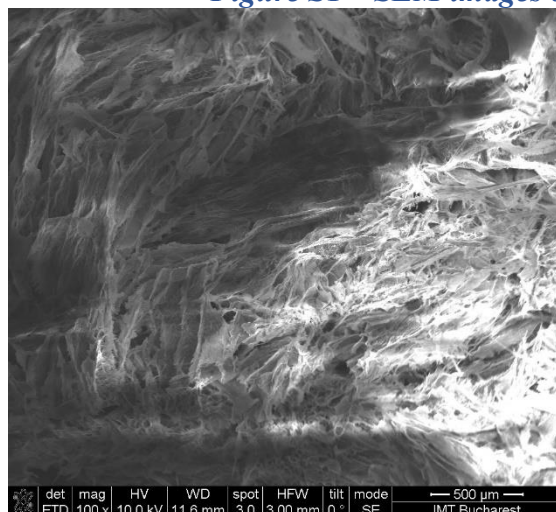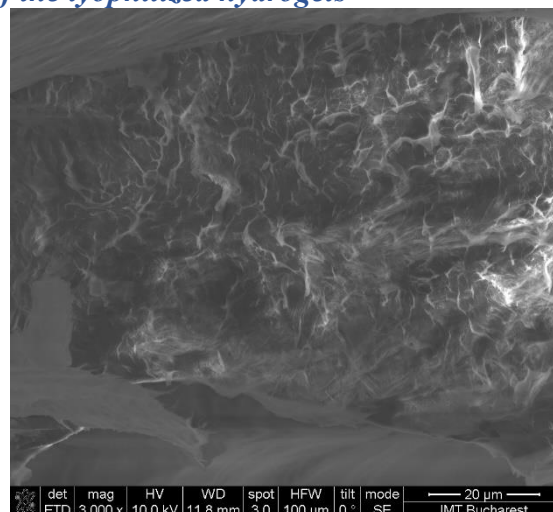

TETR  
A

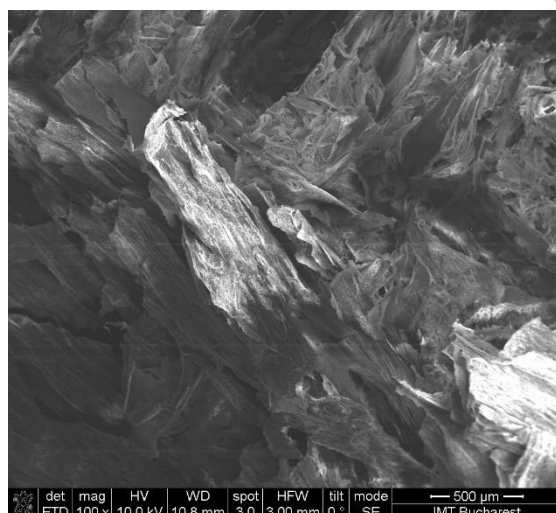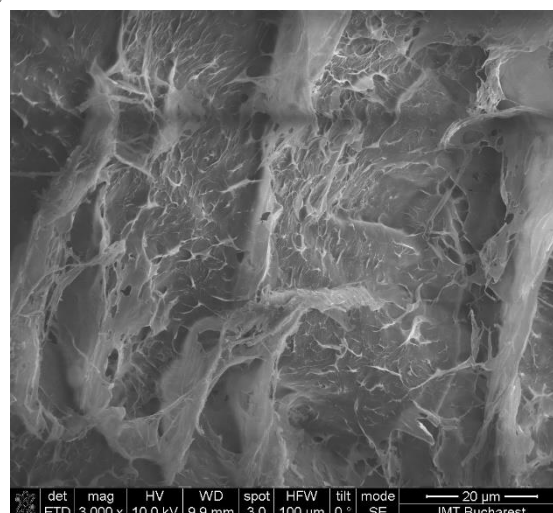

HEXA

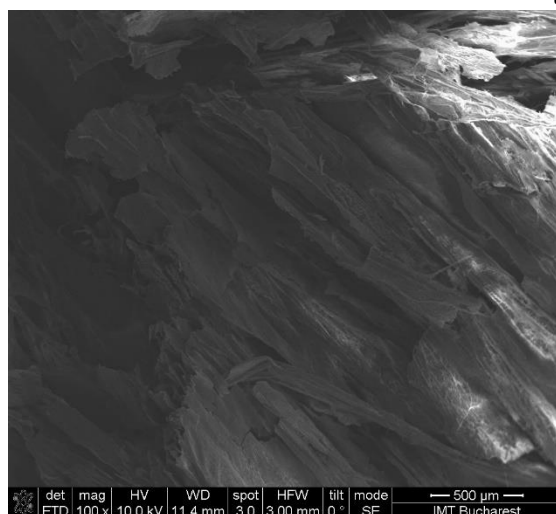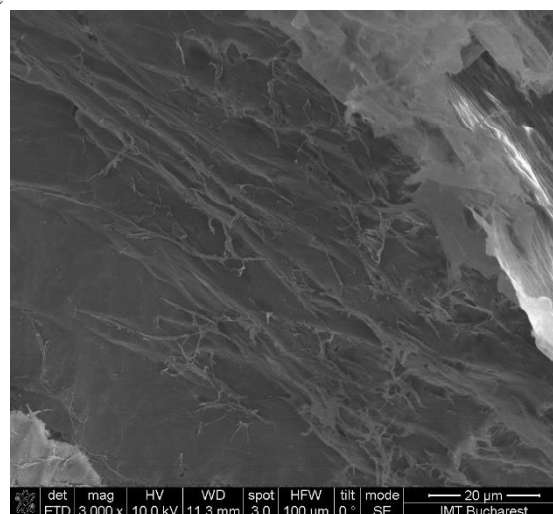

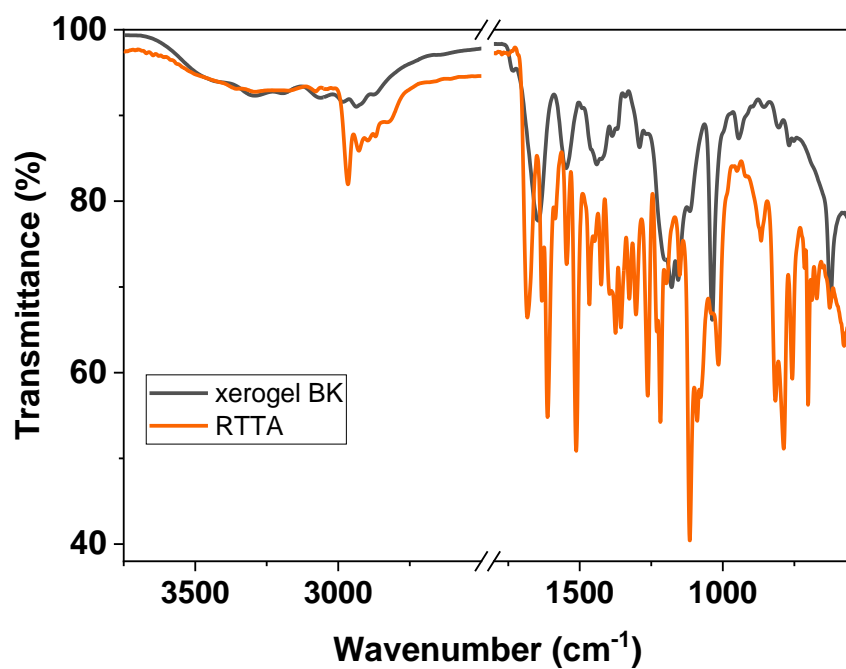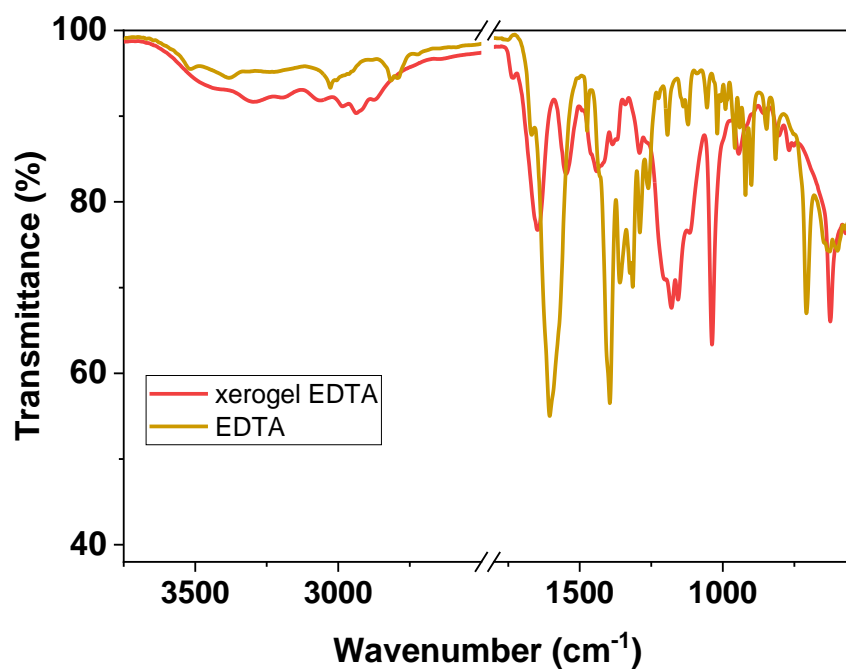

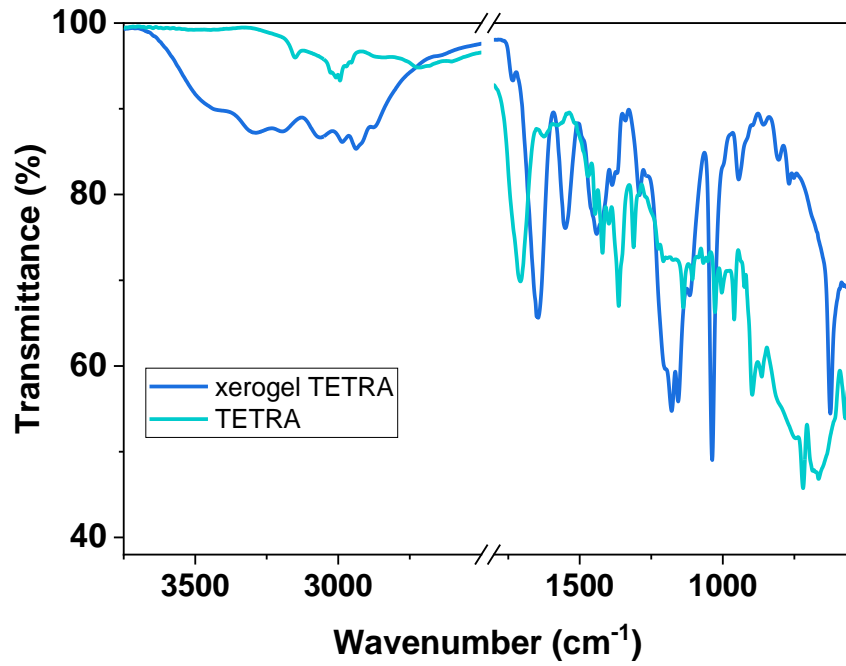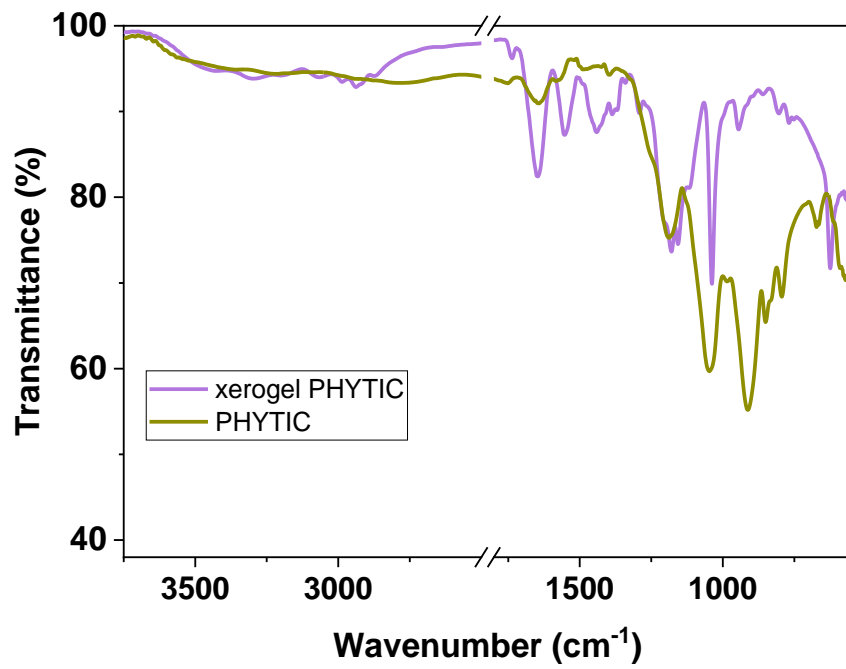

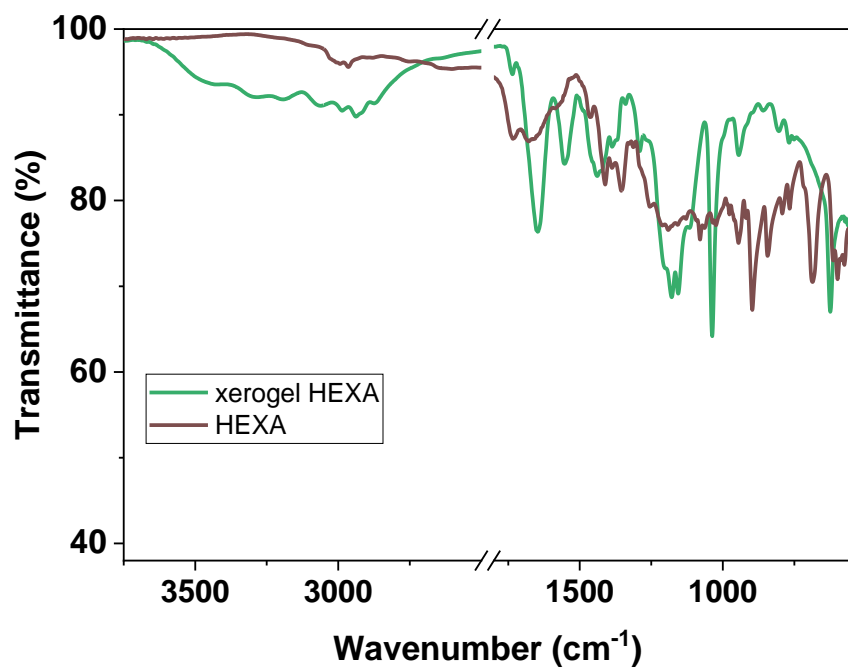

*Figure S2 – FTIR plots*

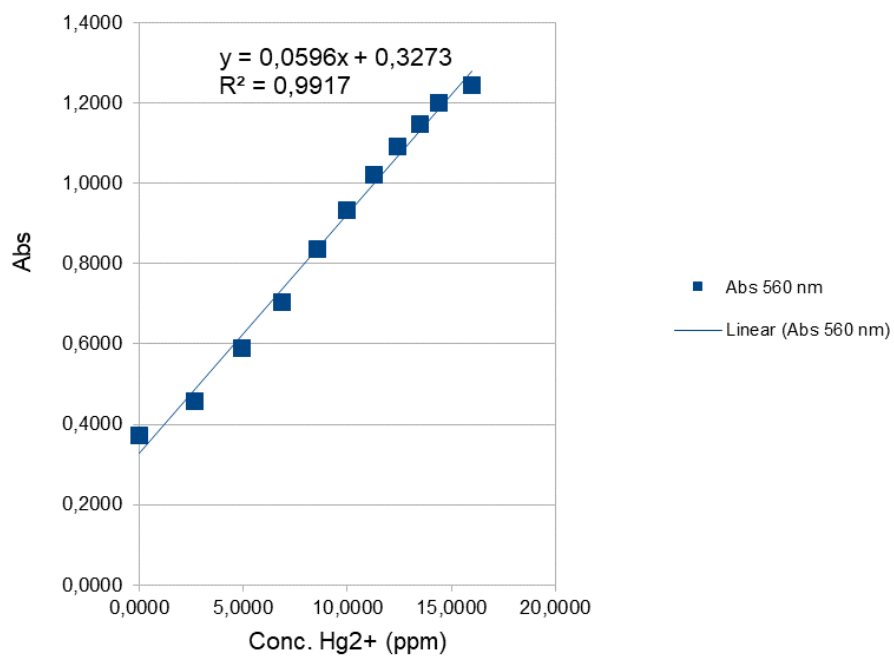

*Figure S3 – UV-Vis calibration curve*

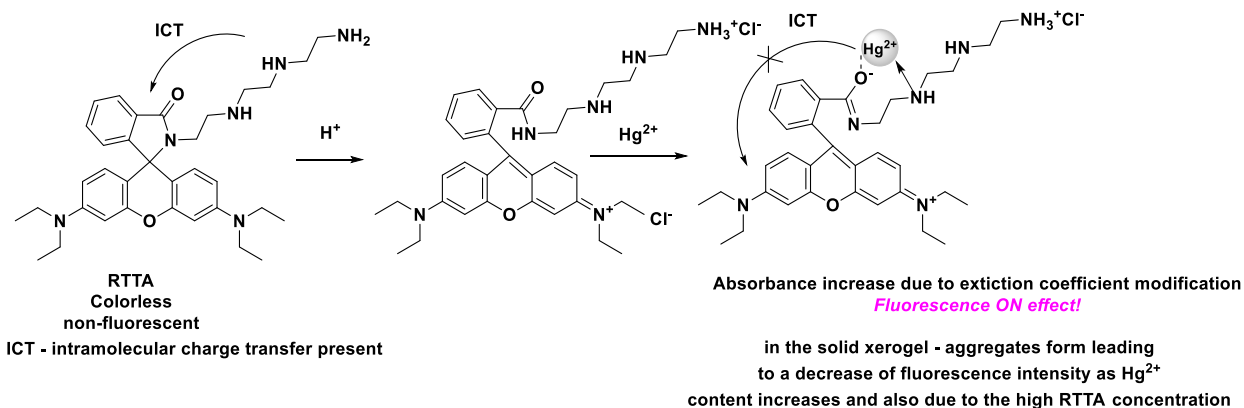

**Scheme S1.** RTTA  $\text{Hg}^{2+}$  interaction steps and mechanism for absorption and emission properties modification

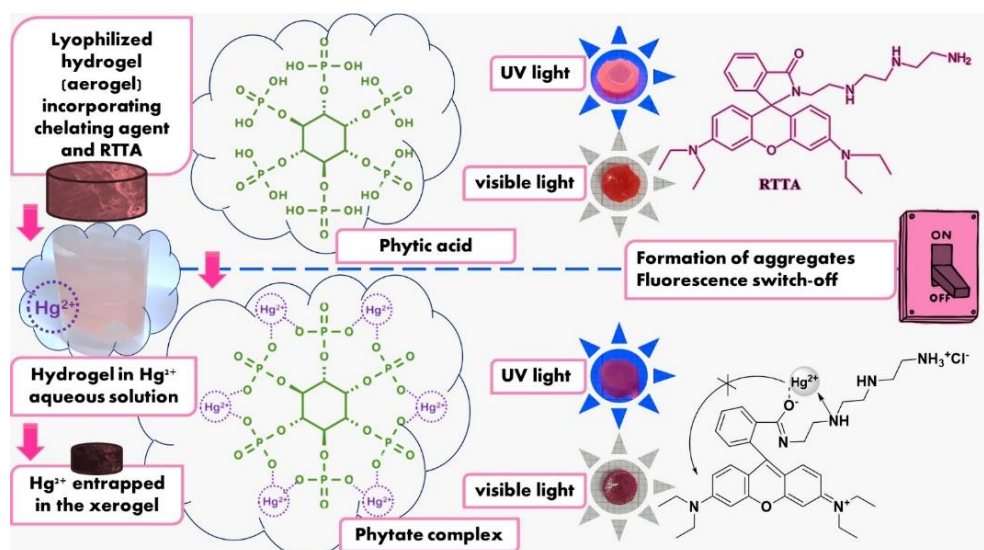

**Scheme S2.** Method principle



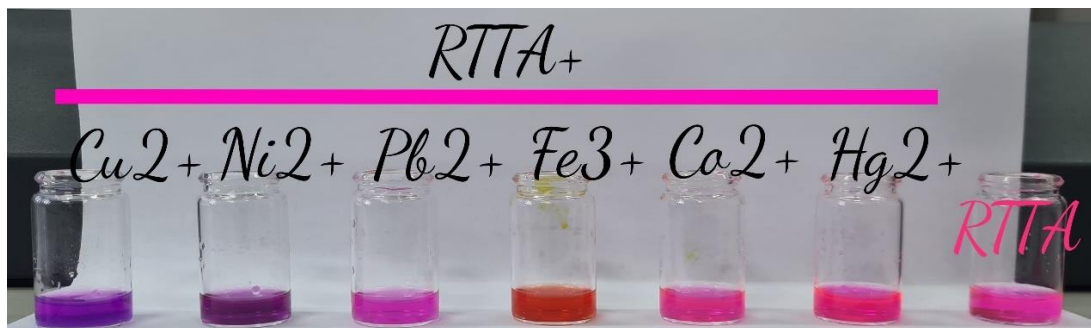

*Figure S4 - Images of RTTA solution color modification due to interaction with different cations*

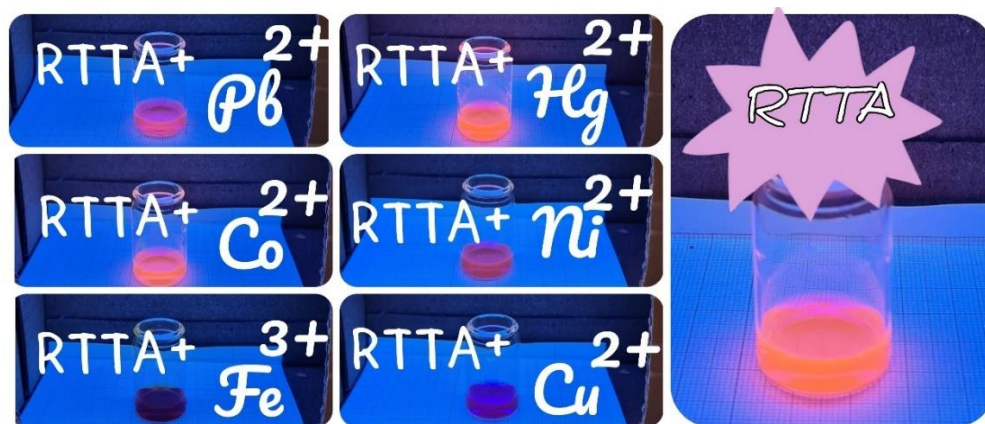

*Figure S5 - Images of RTTA solution emission modification due to interaction with cations*

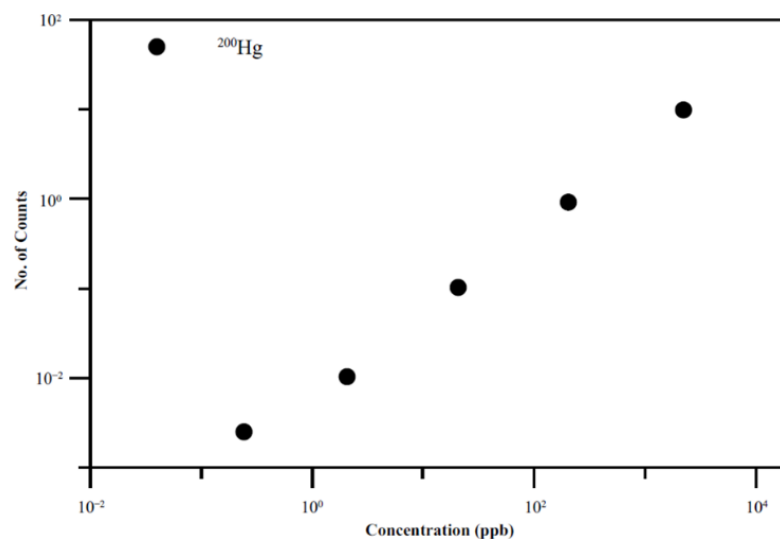

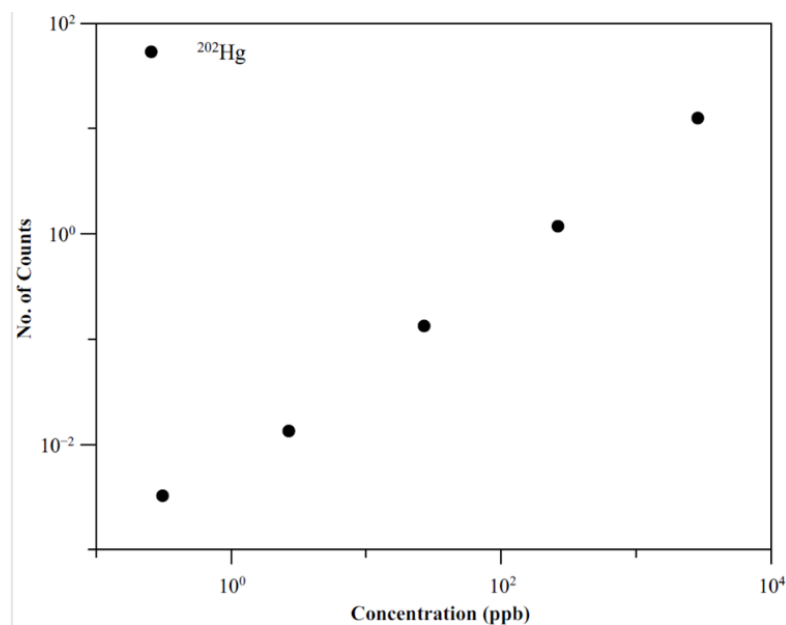

*Figure S6 – ICP-MS calibration*

*Table S1. ICP-MS Accuracy*

|          | <sup>200</sup> Hg [ 1 ] | <sup>202</sup> Hg [ 1 ] |
|----------|-------------------------|-------------------------|
| Accuracy | 107.07%                 | 107.20%                 |

*Table S2. Spike Concentrations*

|                            | Spike 100 % | Spike 10% |
|----------------------------|-------------|-----------|
| Concentration (ppm, mg/kg) | 946         | 94.77     |
